# Supplementary material for: E2F1 Regulates Adipocyte Differentiation and Adipogenesis by Activating ICAT
Source: MDPI journal article supplement (doi:10.3390/cells9041024), 2020-04-21
Supplement: s1 [file s1]

Table S1 Primers for RT-PCR

| Gene name           | Primer sequence (5'-3')                               |
|---------------------|-------------------------------------------------------|
| m-C/EBP $\alpha$    | F: AGGTGCTGGAGTTGACCAGT<br>R: CAGCCTAGAGATCCAGCGAC    |
| m-CCND1             | F: CACAACGCACTTTCTTTCCA<br>R: ACCAGCCTCTTCCTCCACTT    |
| m-GAPDH             | F: AAGCCCATCACCATCTTCCA<br>R: CACCAGTAGACTCCACGACA    |
| m-c-MYC             | F: GCTCGCCCAAATCCTGTA<br>R: AGGACTCGGAGGACAGCA        |
| m- $\beta$ -catenin | F: GCTGCTCATCCCATAATGT<br>R: CCGCGTCATCCTGATAGTTAAT   |
| m-ICAT              | F: CAGTGAGGAGGAATTTCTGCG<br>R: ATCACCACGTCCTCTGCACC   |
| m-PPAR $\gamma$     | F: AGGCGAGGGCGATCTTGACAG<br>R: AATTCGGATGGCCACCTCTTTG |

F: TGAAGAGCATCATAACCCTA

m-AP2

R: TCATAACACATTCCACCACC

F: CCAAGGAGTAAGACCCCTGG

h-GAPDH

R: AGGGGAGATTTCAGTGTGGTG

F: CCCTTCAGACTGGCCCTTAA

h-ICAT

R: CCCTTCAGACTGGCCCTTAA

---

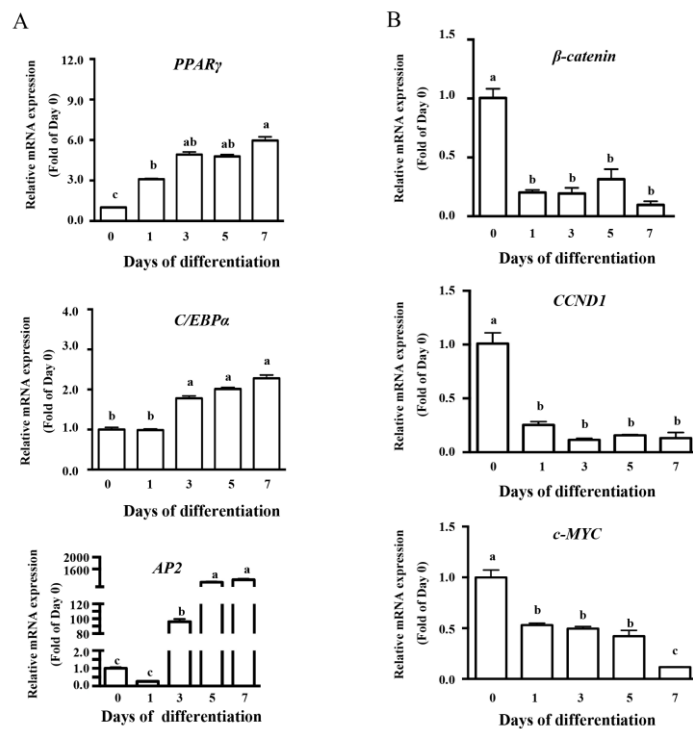

**Figure S1.** mRNA expressions of adipogenic regulators were enhanced, while Wnt/ $\beta$ -catenin targets were reduced during the differentiation process. 3T3-L1 pre-adipocytes were

differentiated into adipocytes by MDI medium for 7 days. (A) mRNA levels of the adipogenic regulators during the differentiation progress. (B) mRNA levels of the Wnt/ $\beta$ -catenin targets during the differentiation progress. Values are means  $\pm$  SEMs,  $n = 3$  independent experiments. Means without a common letter differ,  $P < 0.05$ . AP2, fatty acid binding protein; C/EBP $\alpha$ , CCAAT-enhancer binding protein  $\alpha$ ; PPAR $\gamma$ , peroxisome proliferator activated receptor  $\gamma$ .

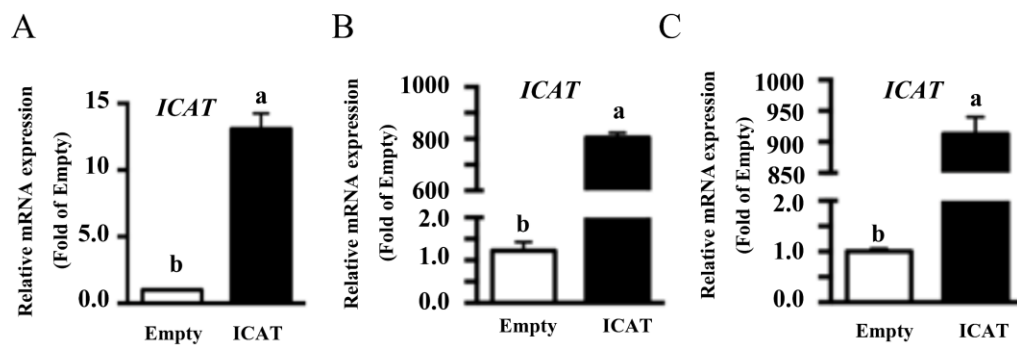

**Figure S2.** Gene expressions of ICAT in 3T3-L1, HeLa and HepG2 cells. (A) Gene levels of ICAT in stable overexpressed 3T3-L1 cells, (B) HeLa cells and (C) HepG2 cells. Values are means  $\pm$  SEMs,  $n = 3$  independent experiments. Means without a common letter differ,  $P < 0.05$ .

ICAT, Inhibitor of  $\beta$ -catenin and TCF4.
